# Supplementary material
Source: Springer Nature journal article supplement (https://www.springermedizin.de/resource/supplementary/12883_2010_443_MOESM1_ESM.pdf/9455456)

# A

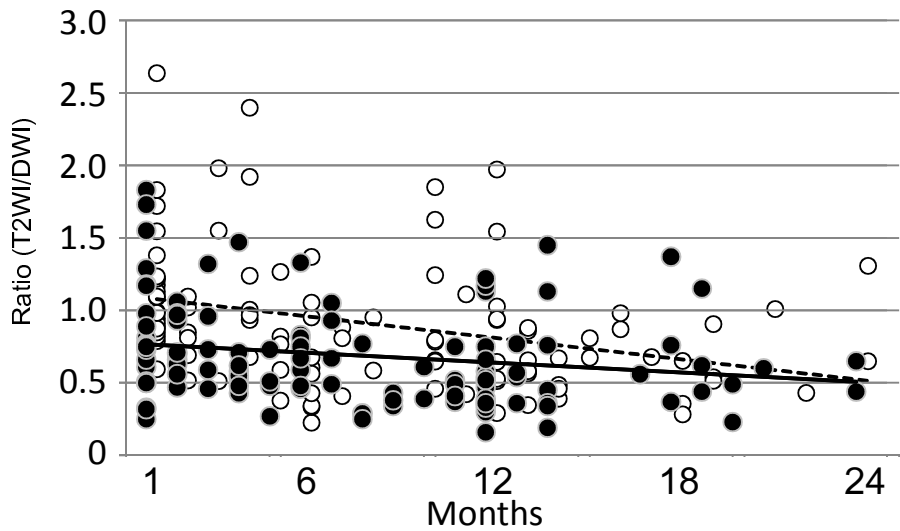

# B

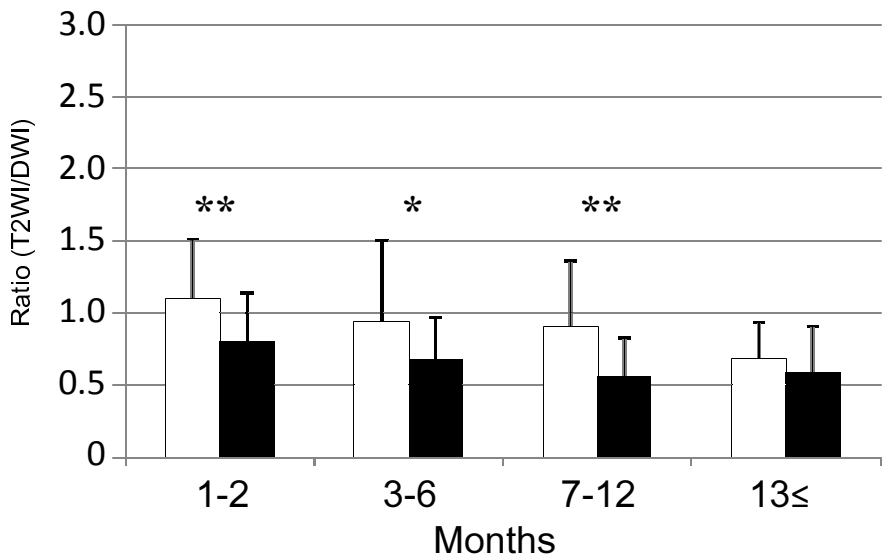

Supplement: MOESM1 [file 9455456]
